# Supplementary material
Source: Research Square preprint supplement (doi:10.21203/rs.3.rs-8965440/v1)
Supplement: Supplementary file 1 [file 189bc2c8ea98b29374aa8f11.pdf]

# Peer evaluators' survey

## Evaluation of the Rubric-Based Peer-to-Peer Project

### Question 1

I served as a tutor during the most recent practical course for **second-year medical students** (dissection of the head, neck, and trunk) and assessed students at least once using the rubric system.

Response options:

- True
  - False
- 

## Section 1 – Peer-to-Peer Rubric Project

### Question 2

It was clear to me what was expected when assessing students using the rubric (e.g., assigned tasks, submission of evaluation forms, and communication with students).

Response scale:

- Strongly disagree
  - Disagree
  - Neutral
  - Agree
  - Strongly agree
- 

### Question 3

The procedure for assessing students and the meaning of the different criteria included in the rubric were clear to me.

Response scale:

- Strongly disagree
  - Disagree
  - Neutral
  - Agree
  - Strongly agree
- 

## Question 4

The workload associated with assessing students using the rubric system was manageable.

Response options:

- True
  - False
- 

## Question 5

I found it difficult to evaluate fellow students.

Response scale:

- Strongly disagree
  - Disagree
  - Neutral
  - Agree
  - Strongly agree
- 

## Question 6

If you answered **Agree** or **Strongly agree**, please explain why.

(Open-ended response)

---

## Question 7

I observed differences between students in the group that was evaluated using the rubric (Group 1) and students in the other groups.

Response scale:

- Strongly disagree
  - Disagree
  - Neutral
  - Agree
  - Strongly agree
- 

## Question 8

If you answered **Agree** or **Strongly agree**, which differences did you observe?

(Open-ended response)

---

## Question 9

Based on my experience participating in this project as a tutor, I believe that, from the perspective of students being evaluated, the rubric system would be an added value if implemented for all groups.

Response options:

- True
  - False
- 

## Question 10

Please provide any additional comments regarding the recent practical course.

(Open-ended response)
