# Supplementary material
Source: Research Square preprint supplement (doi:10.21203/rs.3.rs-8965440/v1)
Supplement: Supplementary file 2 [file a3f25d4949c56af4eb788369.pdf]

## **Students' survey – Evaluation of the Practical Course and Peer-to-Peer Rubric Project**

### **Section 1 – Peer-to-Peer Rubric Project**

#### **Question 38**

The communication regarding the peer-to-peer project using the rubric system was clear (e.g., the purpose of the project, its objectives, and the procedure for requesting feedback via Ufora).

Response scale:

- Strongly disagree
  - Disagree
  - Neutral
  - Agree
  - Strongly agree
- 

#### **Question 39**

The peer-to-peer project with rubric-based assessment during the practical sessions had a positive impact on my learning process.

Response scale:

- Strongly disagree
  - Disagree
  - Neutral
  - Agree
  - Strongly agree
- 

#### **Question 40**

The evaluation of students using the rubric during the practical sessions was conducted objectively by the tutors.

Response scale:

- Strongly disagree

- Disagree
  - Neutral
  - Agree
  - Strongly agree
- 

#### **Question 41**

Receiving feedback during the practical sessions from tutors, as well as feedback provided afterwards via Ufora through the rubric system, was valuable.

Response scale:

- Strongly disagree
  - Disagree
  - Neutral
  - Agree
  - Strongly agree
- 

#### **Question 42**

I adapted my behaviour during the practical sessions in response to the way I was evaluated through the rubric system.

Response options:

- True
  - False
- 

#### **Question 43**

The peer-to-peer rubric project positively influenced my final course grade.

Response scale:

- Strongly disagree
- Disagree
- Neutral
- Agree

- Strongly agree
- 

#### **Question 44**

The peer-to-peer rubric project represents an added value to this practical course and should be implemented for all groups in future academic years.

Response options:

- True
  - False
- 

#### **Question 45**

Please provide any additional comments regarding the peer-to-peer project and rubric-based assessment.

(Open-ended response)

---

### **Section 2 – Evaluation of the Practical Examination (Station Test)**

#### **Question 46**

The dissections constituted a valuable addition compared to the digital learning alternatives (learning path) provided on Ufora.

Response scale:

- Strongly disagree
  - Disagree
  - Neutral
  - Agree
  - Strongly agree
- 

#### **Question 47**

The station test adequately assessed the knowledge acquired during the practical sessions.

Response scale:

- Strongly disagree
  - Disagree
  - Neutral
  - Agree
  - Strongly agree
- 

#### **Question 48**

Sufficient time was available to prepare for the station test.

Response scale:

- Strongly disagree
  - Disagree
  - Neutral
  - Agree
  - Strongly agree
- 

#### **Question 49**

Sufficient time was provided during the station test to answer the questions.

Response scale:

- Strongly disagree
  - Disagree
  - Neutral
  - Agree
  - Strongly agree
- 

#### **Question 50**

The anatomical structures that were assessed during the station test were clearly identified.

Response scale:

- Strongly disagree
  - Disagree
  - Neutral
  - Agree
  - Strongly agree
- 

### **Question 51**

The two open stations in the station test were a valuable component of the assessment.

Response scale:

- Strongly disagree
  - Disagree
  - Neutral
  - Agree
  - Strongly agree
- 

### **Question 52**

How would you evaluate the level of difficulty of the station test?

Response options:

- Very difficult
  - Difficult
  - Appropriate level
  - Easy
  - Very easy
- 

## **Section 3 – Self-Assessment**

### **Question 53**

Please rate your level of anatomical knowledge **before participating in the practical sessions.**

Scale: 1–10

(1 = very low, 10 = very high)

---

**Question 54**

Please rate your level of anatomical knowledge **after completing the practical sessions**.

Scale: 1–10

(1 = very low, 10 = very high)

---

**Question 55**

To what extent do you feel that you successfully completed this practical course?

Scale: 1–10

(1 = not successful at all, 10 = very successful)

---

**Question 56**

Please provide any additional comments regarding the practical course.

(Open-ended response)
